# Supplementary material for: Gut microbiota and metabolite alterations associated with reduced bone mineral density or bone metabolic indexes in postmenopausal osteoporosis
Source: Aging (Albany NY). 2020 May 11;12(9):8583–604. doi: 10.18632/aging.103168 (PMC7244073; doi:10.18632/aging.103168)
Supplement: Supplementary Table 4 [file aging-12-103168-s001..xlsx]

## Sheet: STab4
Supplementary Table 4. The results of correlation analysis between discriminative genera, metabolites and clinical information in the three groups
from	to	cor	pvalue	correlation
g__Agathobacter	g__Citrobacter	0.263045	0.00644471	positive
g__Agathobacter	g__Desulfovibrio	0.305324	0.00145963	positive
g__Agathobacter	g__Enterobacter	0.215975	0.0261788	positive
g__Citrobacter	g__Enterobacter	0.566622	2.43244e-10	positive
g__Citrobacter	g__Escherichia/Shigella	0.453245	1.06726e-06	positive
g__Enterobacter	g__Escherichia/Shigella	0.39545	2.72304e-05	positive
g__Blautia	g__Flavonifractor	0.234003	0.0157672	positive
g__Citrobacter	g__Flavonifractor	0.308165	0.00131026	positive
g__Agathobacter	g__Fusicatenibacter	0.232198	0.0166154	positive
g__Blautia	g__Fusicatenibacter	0.600387	1.0278e-11	positive
g__Citrobacter	g__Fusicatenibacter	0.216436	0.0258534	positive
g__Flavonifractor	g__Fusicatenibacter	0.213616	0.0279007	positive
g__Citrobacter	g__Klebsiella	0.41194	1.14746e-05	positive
g__Enterobacter	g__Klebsiella	0.667867	5.28899e-15	positive
g__Escherichia/Shigella	g__Klebsiella	0.372575	8.38951e-05	positive
g__Agathobacter	g__Lachnospiraceae_NK4A136_group	0.376434	6.97936e-05	positive
g__Citrobacter	g__Lachnospiraceae_NK4A136_group	0.297927	0.00192393	positive
g__Fusicatenibacter	g__Lachnospiraceae_NK4A136_group	0.205824	0.034287	positive
g__Agathobacter	g__Lachnospiraceae_UCG-001	0.321213	0.000787043	positive
g__Blautia	g__Lachnospiraceae_UCG-001	0.222066	0.0221463	positive
g__Fusicatenibacter	g__Lachnospiraceae_UCG-001	0.369924	9.5076e-05	positive
g__Lachnospiraceae_NK4A136_group	g__Lachnospiraceae_UCG-001	0.444684	1.79189e-06	positive
g__Blautia	g__Lachnospiraceae_UCG-004	0.232337	0.0165486	positive
g__Fusicatenibacter	g__Lachnospiraceae_UCG-004	0.349951	0.000235782	positive
g__Lachnospiraceae_UCG-001	g__Lachnospiraceae_UCG-004	0.220793	0.0229424	positive
g__Allisonella	g__Megasphaera	0.345624	0.000284832	positive
g__Escherichia/Shigella	g__Morganella	0.273616	0.00453952	positive
g__Klebsiella	g__Morganella	0.366273	0.00011275	positive
g__Allisonella	g__Prevotella_2	0.276121	0.00416941	positive
g__Blautia	g__Prevotella_2	-0.322694	0.000741736	negative
g__Fusicatenibacter	g__Prevotella_2	-0.228913	0.0182608	negative
g__Megasphaera	g__Prevotella_2	0.413225	1.0707e-05	positive
g__Desulfovibrio	g__Prevotella_7	-0.237006	0.0144391	negative
g__Flavonifractor	g__Prevotella_7	-0.220375	0.0232089	negative
g__Escherichia/Shigella	g__Prevotellaceae_NK3B31_group	0.326144	0.000645273	positive
g__Fusicatenibacter	g__Prevotellaceae_NK3B31_group	-0.295633	0.00209294	negative
g__Morganella	g__Prevotellaceae_NK3B31_group	0.259054	0.00733055	positive
g__Blautia	g__Pseudomonas	0.215296	0.0266648	positive
g__Citrobacter	g__Pseudomonas	0.282985	0.00328966	positive
g__Flavonifractor	g__Pseudomonas	0.277519	0.00397473	positive
g__Megasphaera	g__Pseudomonas	0.208996	0.0315526	positive
g__Agathobacter	g__Pyramidobacter	0.25871	0.00741181	positive
g__Citrobacter	g__Pyramidobacter	0.282226	0.0033779	positive
g__Enterobacter	g__Pyramidobacter	0.201862	0.0379804	positive
g__Lachnospiraceae_NK4A136_group	g__Pyramidobacter	0.315927	0.000970245	positive
g__Lachnospiraceae_UCG-001	g__Pyramidobacter	0.282637	0.0033298	positive
g__Allisonella	g__Succinivibrio	0.294891	0.0021504	positive
g__Blautia	g__Succinivibrio	-0.22934	0.0180392	negative
g__Fusicatenibacter	g__Succinivibrio	-0.2057	0.0343977	negative
g__Klebsiella	g__Succinivibrio	0.200048	0.039779	positive
g__Lachnospiraceae_NK4A136_group	g__Succinivibrio	-0.231821	0.0167975	negative
g__Megasphaera	g__Succinivibrio	0.311449	0.00115501	positive
g__Morganella	g__Succinivibrio	0.230007	0.0176977	positive
g__Prevotella_2	g__Succinivibrio	0.390213	3.54922e-05	positive
g__Agathobacter	g__UBA1819	0.233423	0.0160356	positive
g__Blautia	g__UBA1819	0.230986	0.0172068	positive
g__Citrobacter	g__UBA1819	0.200834	0.0389913	positive
g__Flavonifractor	g__UBA1819	0.441869	2.11832e-06	positive
g__Fusicatenibacter	g__UBA1819	0.264837	0.00607869	positive
g__Lachnospiraceae_NK4A136_group	g__UBA1819	0.201471	0.0383618	positive
g__Morganella	g__UBA1819	-0.206453	0.0337291	negative
g__Prevotellaceae_NK3B31_group	g__UBA1819	-0.331597	0.000516017	negative
g__Pseudomonas	g__UBA1819	0.357418	0.000169068	positive
g__Allisonella	g__Veillonella	0.222176	0.0220789	positive
g__Enterobacter	g__Veillonella	0.22161	0.0224285	positive
g__Escherichia/Shigella	g__Veillonella	0.398156	2.37032e-05	positive
g__Klebsiella	g__Veillonella	0.249429	0.00992395	positive
g__Megasphaera	g__Veillonella	0.303717	0.00155085	positive
g__Morganella	g__Veillonella	0.426822	5.05377e-06	positive
g__Prevotella_2	g__Veillonella	0.232094	0.0166653	positive
g__Prevotellaceae_NK3B31_group	g__Veillonella	0.268002	0.00547724	positive
g__Veillonella	2-Dehydro-3-deoxy-D-gluconate	0.210064	0.0306739	positive
g__Lachnospiraceae_UCG-004	Arg-Ile	-0.339326	0.000373214	negative
g__Citrobacter	Histamine	0.202709	0.0371643	positive
g__Morganella	Histamine	0.260132	0.00708133	positive
g__Pyramidobacter	Histamine	0.317401	0.000915581	positive
g__Veillonella	Histamine	0.206779	0.033443	positive
g__Citrobacter	Levulinic acid	-0.237984	0.0140278	negative
g__Prevotella_7	Levulinic acid	-0.222878	0.0216517	negative
g__Allisonella	L-Lysine	0.217418	0.025171	positive
g__Blautia	L-Lysine	-0.253594	0.00871641	negative
g__Fusicatenibacter	L-Lysine	-0.225251	0.0202585	negative
Arg-Ile	L-Lysine	0.313318	0.00107428	positive
g__Citrobacter	L-Threonate	0.306925	0.00137366	positive
g__Enterobacter	L-Threonate	0.217463	0.0251399	positive
g__Escherichia/Shigella	L-Threonate	0.339503	0.000370412	positive
2-Dehydro-3-deoxy-D-gluconate	L-Threonate	0.323999	0.000703781	positive
g__Escherichia/Shigella	N-Acetylcadaverine	0.255774	0.00813776	positive
g__Pyramidobacter	N-Acetylcadaverine	0.200324	0.0395017	positive
Arg-Ile	N-Acetylcadaverine	0.201189	0.0386397	positive
Histamine	N-Acetylcadaverine	0.471577	3.35171e-07	positive
g__Prevotella_7	N-Acetylmannosamine	-0.281722	0.00343779	negative
Arg-Ile	N-Acetylmannosamine	0.284087	0.00316507	positive
Levulinic acid	N-Acetylmannosamine	0.209573	0.0310757	positive
g__Escherichia/Shigella	N-Acetylputrescine	0.217287	0.0252612	positive
g__Lachnospiraceae_NK4A136_group	N-Acetylputrescine	0.212421	0.028809	positive
g__Pyramidobacter	N-Acetylputrescine	0.227457	0.0190339	positive
2-Dehydro-3-deoxy-D-gluconate	N-Acetylputrescine	0.377958	6.48599e-05	positive
Histamine	N-Acetylputrescine	0.430385	4.12883e-06	positive
L-Threonate	N-Acetylputrescine	0.218258	0.0245996	positive
N-Acetylcadaverine	N-Acetylputrescine	0.664942	7.64831e-15	positive
Histamine	Pantothenate	-0.431322	3.91355e-06	negative
Levulinic acid	Pantothenate	0.437066	2.80869e-06	positive
N-Acetylcadaverine	Pantothenate	-0.257012	0.00782435	negative
N-Acetylputrescine	Pantothenate	-0.25546	0.00821889	negative
g__Agathobacter	Pro-Ala	-0.212405	0.0288215	negative
g__Citrobacter	Pro-Ala	-0.261215	0.00683835	negative
g__Enterobacter	Pro-Ala	-0.216639	0.0257108	negative
g__Escherichia/Shigella	Pro-Ala	-0.257033	0.00781902	negative
g__Pyramidobacter	Pro-Ala	-0.208504	0.0319637	negative
g__Veillonella	Pro-Ala	-0.227028	0.0192667	negative
Arg-Ile	Pro-Ala	0.485543	1.32412e-07	positive
Histamine	Pro-Ala	-0.287916	0.00276457	negative
Levulinic acid	Pro-Ala	0.214691	0.0271044	positive
N-Acetylmannosamine	Pro-Ala	0.297408	0.00196104	positive
Pantothenate	Pro-Ala	0.429922	4.23941e-06	positive
g__UBA1819	Thymidine	-0.221288	0.0226299	negative
Histamine	Thymidine	-0.213422	0.0280468	negative
Pantothenate	Thymidine	0.222903	0.021636	positive
g__Agathobacter	Val-Pro	-0.237229	0.0143445	negative
g__Pyramidobacter	Val-Pro	-0.255769	0.0081391	negative
Arg-Ile	Val-Pro	0.393566	2.99691e-05	positive
Histamine	Val-Pro	-0.231085	0.0171575	negative
Pro-Ala	Val-Pro	0.521455	9.95996e-09	positive
g__Blautia	LS.BMD	0.296358	0.00203811	positive
g__Prevotella_7	LS.BMD	0.290765	0.00249683	positive
Arg-Ile	LS.BMD	-0.2297	0.0178541	negative
Levulinic acid	LS.BMD	-0.295752	0.00208385	negative
N-Acetylmannosamine	LS.BMD	-0.315719	0.000978186	negative
Arg-Ile	FN.BMD	-0.260451	0.00700891	negative
N-Acetylmannosamine	FN.BMD	-0.203508	0.0364071	negative
LS.BMD	FN.BMD	0.826542	1.03786e-27	positive
g__Prevotella_7	Total.hip.BMD	0.212822	0.0285011	positive
Arg-Ile	Total.hip.BMD	-0.202645	0.037225	negative
Levulinic acid	Total.hip.BMD	-0.225841	0.0199243	negative
N-Acetylmannosamine	Total.hip.BMD	-0.221891	0.0222542	negative
LS.BMD	Total.hip.BMD	0.829349	4.79575e-28	positive
FN.BMD	Total.hip.BMD	0.924597	2.16579e-45	positive
g__Morganella	E2	0.202819	0.0370587	positive
LS.BMD	E2	0.473725	2.91331e-07	positive
FN.BMD	E2	0.41792	8.29251e-06	positive
Total.hip.BMD	E2	0.410614	1.23214e-05	positive
g__Allisonella	OH.VD	-0.215691	0.0263815	negative
g__Blautia	OH.VD	-0.224712	0.0205683	negative
g__Citrobacter	OH.VD	-0.247902	0.0104021	negative
Histamine	OH.VD	-0.203326	0.0365788	negative
g__Klebsiella	BGP	0.237697	0.0141474	positive
Total.hip.BMD	BGP	-0.211647	0.0294106	negative
OH.VD	BGP	-0.28685	0.0028712	negative
g__Allisonella	CTX	0.233928	0.0158015	positive
g__Klebsiella	CTX	0.232964	0.0162507	positive
g__Megasphaera	CTX	0.210779	0.030098	positive
Total.hip.BMD	CTX	-0.207964	0.0324214	negative
BGP	CTX	0.726911	1.13026e-18	positive
g__Allisonella	P1NP	0.237497	0.0142312	positive
g__Klebsiella	P1NP	0.226834	0.0193728	positive
g__Megasphaera	P1NP	0.224483	0.0207005	positive
g__Prevotella_7	P1NP	-0.225234	0.0202685	negative
g__Succinivibrio	P1NP	0.2013	0.0385299	positive
N-Acetylcadaverine	P1NP	0.213694	0.0278421	positive
OH.VD	P1NP	-0.361873	0.000138096	negative
BGP	P1NP	0.797673	1.40593e-24	positive
CTX	P1NP	0.73884	1.56012e-19	positive
